# Supplementary material for: Insoluble Aβ overexpression in an App knock-in mouse model alters microstructure and gamma oscillations in the prefrontal cortex, affecting anxiety-related behaviours
Source: Oxford University Press journal article supplement (doi:10.1242/dmm.040550), 2019-08-22
Supplement: dmm040550supp.pdf [file dmm040550supp.pdf]

## Supplemental Material

| Brain Region       | DTI Measure | ANOVA Comparison | F Value              | P Value   |
|--------------------|-------------|------------------|----------------------|-----------|
| Anterior Amygdala  | FA          | Genotype         | $F_{(1, 14)} < 1$    | P = 0.384 |
|                    |             | Hemisphere       | $F_{(1, 14)} = 2.76$ | P = 0.095 |
| Posterior Amygdala | FA          | Genotype         | $F_{(1, 14)} < 1$    | P = 0.300 |
|                    |             | Hemisphere       | $F_{(1, 14)} < 1$    | P = 0.184 |
| BLA                | FA          | Genotype         | $F_{(1, 14)} < 1$    | P = 0.268 |
|                    |             | Hemisphere       | $F_{(1, 14)} < 1$    | P = 0.168 |
| Anterior Amygdala  | MD          | Genotype         | $F_{(1, 14)} < 1$    | P = 0.179 |
|                    |             | Hemisphere       | $F_{(1, 14)} < 1$    | P = 0.353 |
| Posterior Amygdala | MD          | Genotype         | $F_{(1, 14)} < 1$    | P = 0.274 |
|                    |             | Hemisphere       | $F_{(1, 14)} < 1$    | P = 0.226 |
| BLA                | MD          | Genotype         | $F_{(1, 14)} = 3.23$ | P = 0.084 |
|                    |             | Hemisphere       | $F_{(1, 14)} = 1.55$ | P = 0.137 |
| Anterior Amygdala  | AD          | Genotype         | $F_{(1, 14)} < 1$    | P = 0.173 |
|                    |             | Hemisphere       | $F_{(1, 14)} < 1$    | P = 0.242 |
| Posterior Amygdala | AD          | Genotype         | $F_{(1, 14)} < 1$    | P = 0.221 |
|                    |             | Hemisphere       | $F_{(1, 14)} < 1$    | P = 0.252 |
| BLA                | AD          | Genotype         | $F_{(1, 14)} = 5.81$ | P = 0.053 |
|                    |             | Hemisphere       | $F_{(1, 14)} = 2.55$ | P = 0.105 |
| Anterior Amygdala  | RD          | Genotype         | $F_{(1, 14)} < 1$    | P = 0.189 |
|                    |             | Hemisphere       | $F_{(1, 14)} < 1$    | P = 0.247 |
| Posterior Amygdala | RD          | Genotype         | $F_{(1, 14)} < 1$    | P = 0.332 |
|                    |             | Hemisphere       | $F_{(1, 14)} < 1$    | P = 0.194 |
| BLA                | RD          | Genotype         | $F_{(1, 14)} = 2.67$ | P = 0.100 |
|                    |             | Hemisphere       | $F_{(1, 14)} < 1$    | P = 0.205 |

**Table S1** Statistical analysis of the anterior (Bregma -1.94 mm) and posterior (Bregma -3.28 mm) amygdala, analysed for fractional anisotropy (FA), mean diffusion (MD), axial diffusion (AD) and radial diffusion (RD). Corrected P values stated (Benjamini-Hochberg corrected).

| Brain Region                 | DTI Measure | ANOVA Comparison | F Value                                | P Value          |
|------------------------------|-------------|------------------|----------------------------------------|------------------|
| Anterior Hippocampus         | FA          | Genotype         | $F_{(1,14)} < 1$                       | P = 0.342        |
|                              |             | Hemisphere       | $F_{(1, 14)} = 2.18$                   | P = 0.116        |
| Posterior Hippocampus        | FA          | Genotype         | $F_{(1, 14)} < 1$                      | P = 0.263        |
|                              |             | Hemisphere       | $F_{(1, 14)} < 1$                      | P = 0.305        |
| Anterior Hippocampus         | MD          | Genotype         | $F_{(1, 14)} = 2.89$                   | P = 0.089        |
|                              |             | Hemisphere       | $F_{(1, 14)} < 1$                      | P = 0.311        |
| Posterior Hippocampus        | MD          | Genotype         | $F_{(1, 14)} = 12.18$                  | P = 0.011        |
|                              |             | Hemisphere       | $F_{(1, 14)} = 1.07$                   | P = 0.163        |
| <b>Anterior Hippocampus</b>  | <b>AD</b>   | <b>Genotype</b>  | <b><math>F_{(1, 14)} = 7.56</math></b> | <b>P = 0.047</b> |
|                              |             | Hemisphere       | $F_{(1, 14)} < 1$                      | P = 0.316        |
| Posterior Hippocampus        | AD          | Genotype         | $F_{(1, 14)} = 4.45$                   | P = 0.068        |
|                              |             | Hemisphere       | $F_{(1, 14)} < 1$                      | P = 0.211        |
| Anterior Hippocampus         | RD          | Genotype         | $F_{(1, 14)} = 1.52$                   | P = 0.142        |
|                              |             | Hemisphere       | $F_{(1, 14)} < 1$                      | P = 0.237        |
| <b>Posterior Hippocampus</b> | <b>RD</b>   | <b>Genotype</b>  | <b><math>F_{(1, 14)} &lt; 1</math></b> | <b>P = 0.005</b> |
|                              |             | Hemisphere       | $F_{(1, 14)} < 1$                      | P = 0.158        |

**Table S2** Statistical analysis of the anterior (Bregma -1.94 mm) and posterior (Bregma -3.28 mm) hippocampus for fractional anisotropy (FA), mean diffusion (MD), axial diffusion (AD) and radial diffusion (RD). Corrected P values stated (Benjamini-Hochberg corrected).

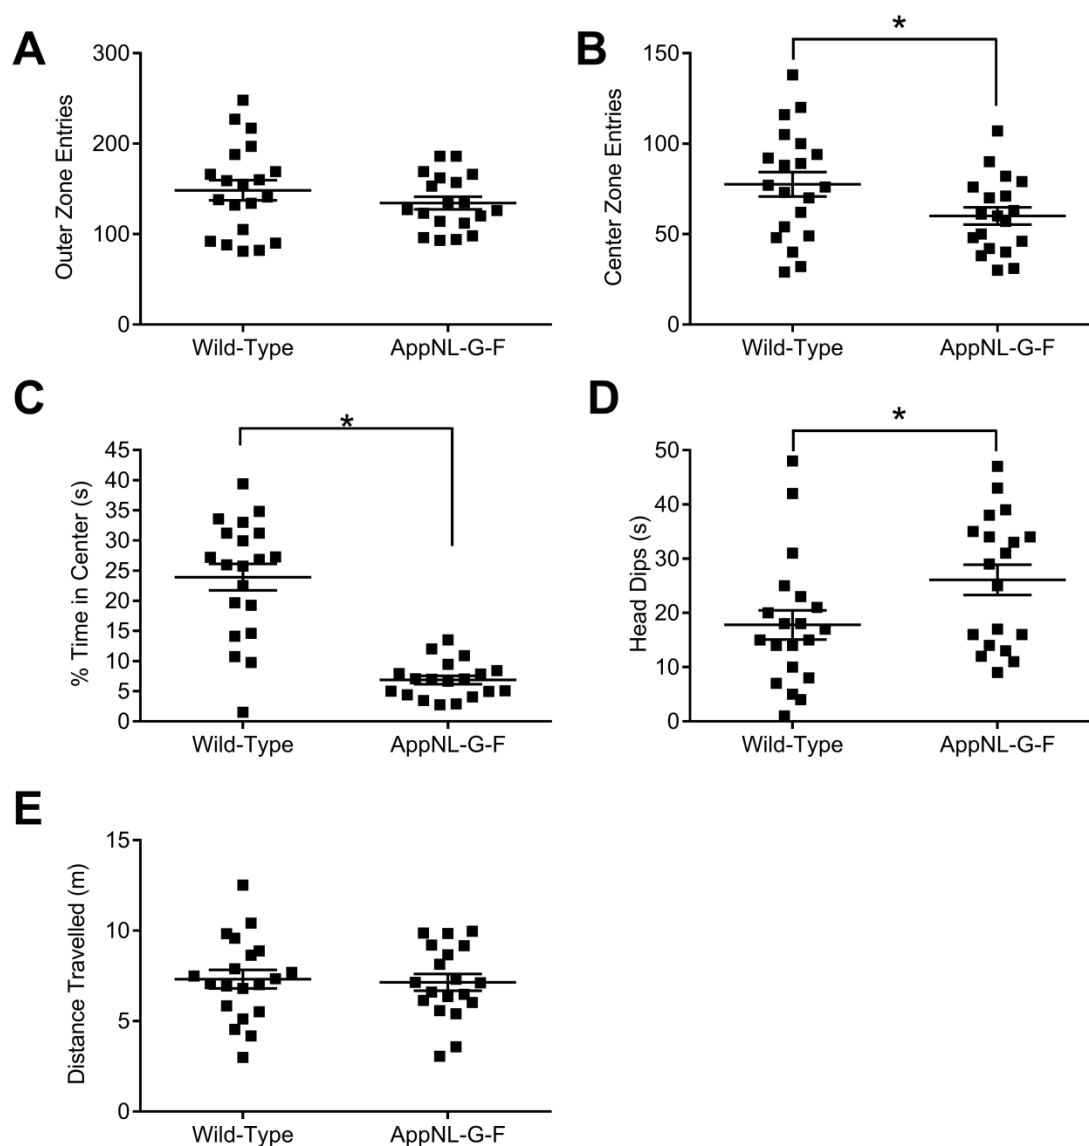

**Figure S1.** **A.** No significant differences were observed for entries made to the outer zone (genotype  $F_{(1, 35)} = 1.43$ ,  $p = 0.240$ , genotype  $\times$  sex  $F_{(1, 35)} < 1$ ,  $p = 0.928$ ). **B.** *App<sup>NL-G-F</sup>* KI mice made fewer entries into the centre zone (genotype  $F_{(1, 35)} = 5.12$ ,  $p = 0.030$ , genotype  $\times$  sex  $F_{(1, 35)} < 1$ ,  $p = 0.727$ ). **C.** *App<sup>NL-G-F</sup>* KI mice spent significantly less time in the centre zone in the elevated plus maze (genotype  $F_{(1, 35)} = 5.39$ ,  $p = 0.030$ , genotype  $\times$  sex  $F_{(1, 35)} < 1$ ,  $p = 0.850$ ). **D.** There was a main effect of genotype for the number of head dips made in the elevated plus maze (genotype  $F_{(1, 35)} = 5.13$ ,  $p = 0.030$ , genotype  $\times$  sex  $F_{(1, 35)} < 1$ ,  $p = 0.577$ ). **E.** Distance travelled in the elevated plus maze was similar between the genotypes (genotype  $F_{(1, 35)} < 1$ ,  $p = 0.861$ , genotype  $\times$  sex  $F_{(1, 35)} < 1$ ,  $p = 0.400$ ).

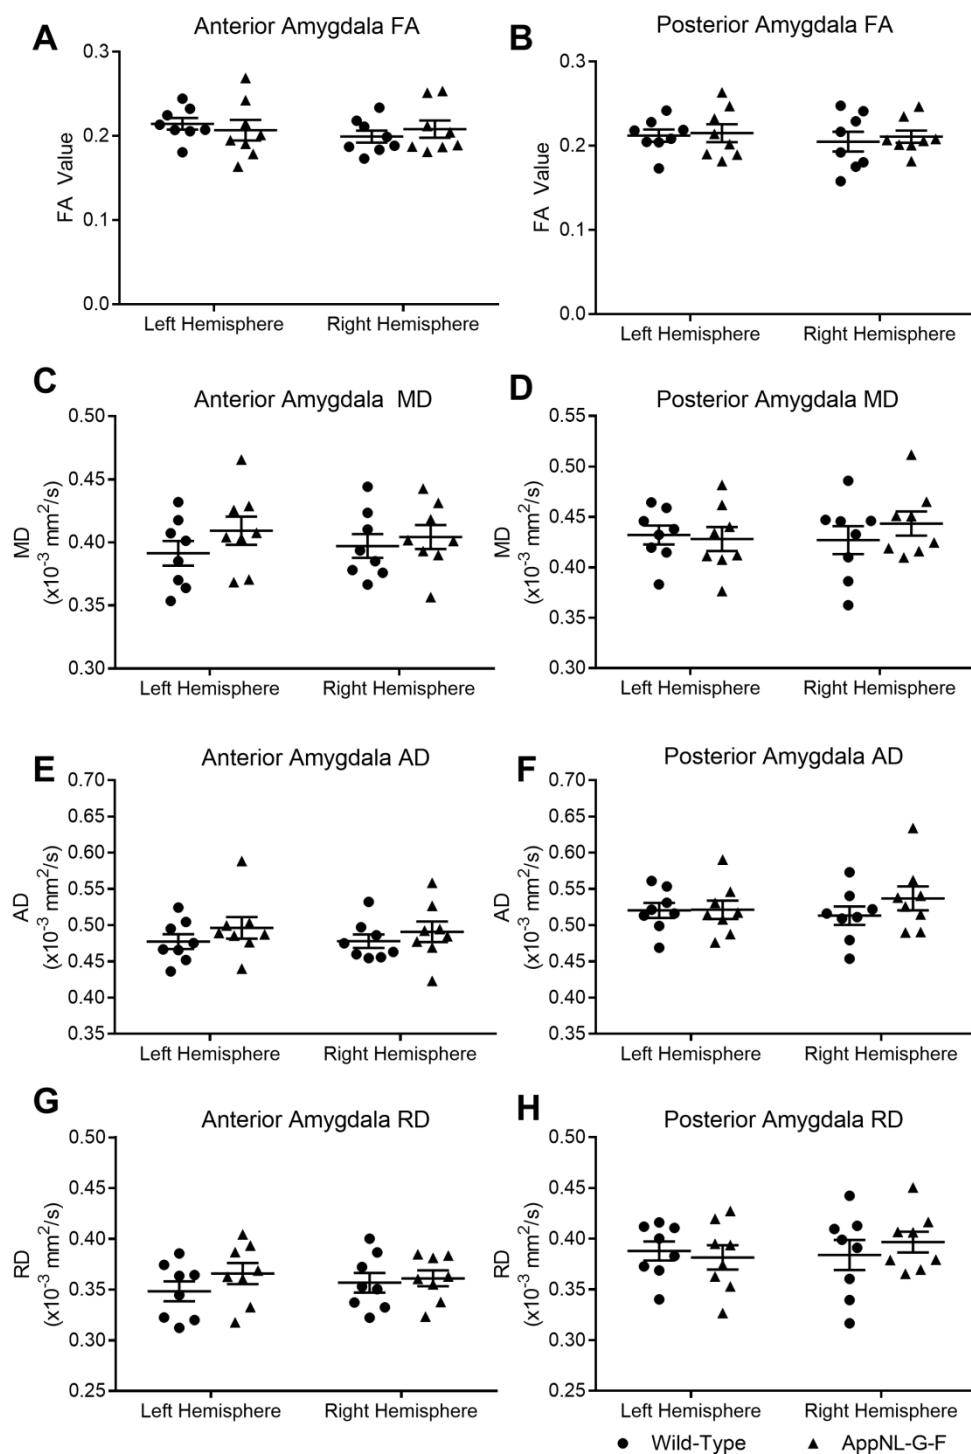

**Figure S2.** Fractional anisotropy (FA), mean diffusivity (MD), axial diffusivity (AD) and radial diffusivity (RD) in the amygdala. The entire amygdala was segmented from DTI images at two regions; anterior (A, C, E, G: Bregma -1.94 mm) and posterior (B, D, F, H: Bregma -2.46 mm). No significant differences were observed between the genotypes for anterior or posterior regions. Error bars represent s.e.m. Wild-type n=8, *App<sup>NL-G-F</sup>* KI n=8.

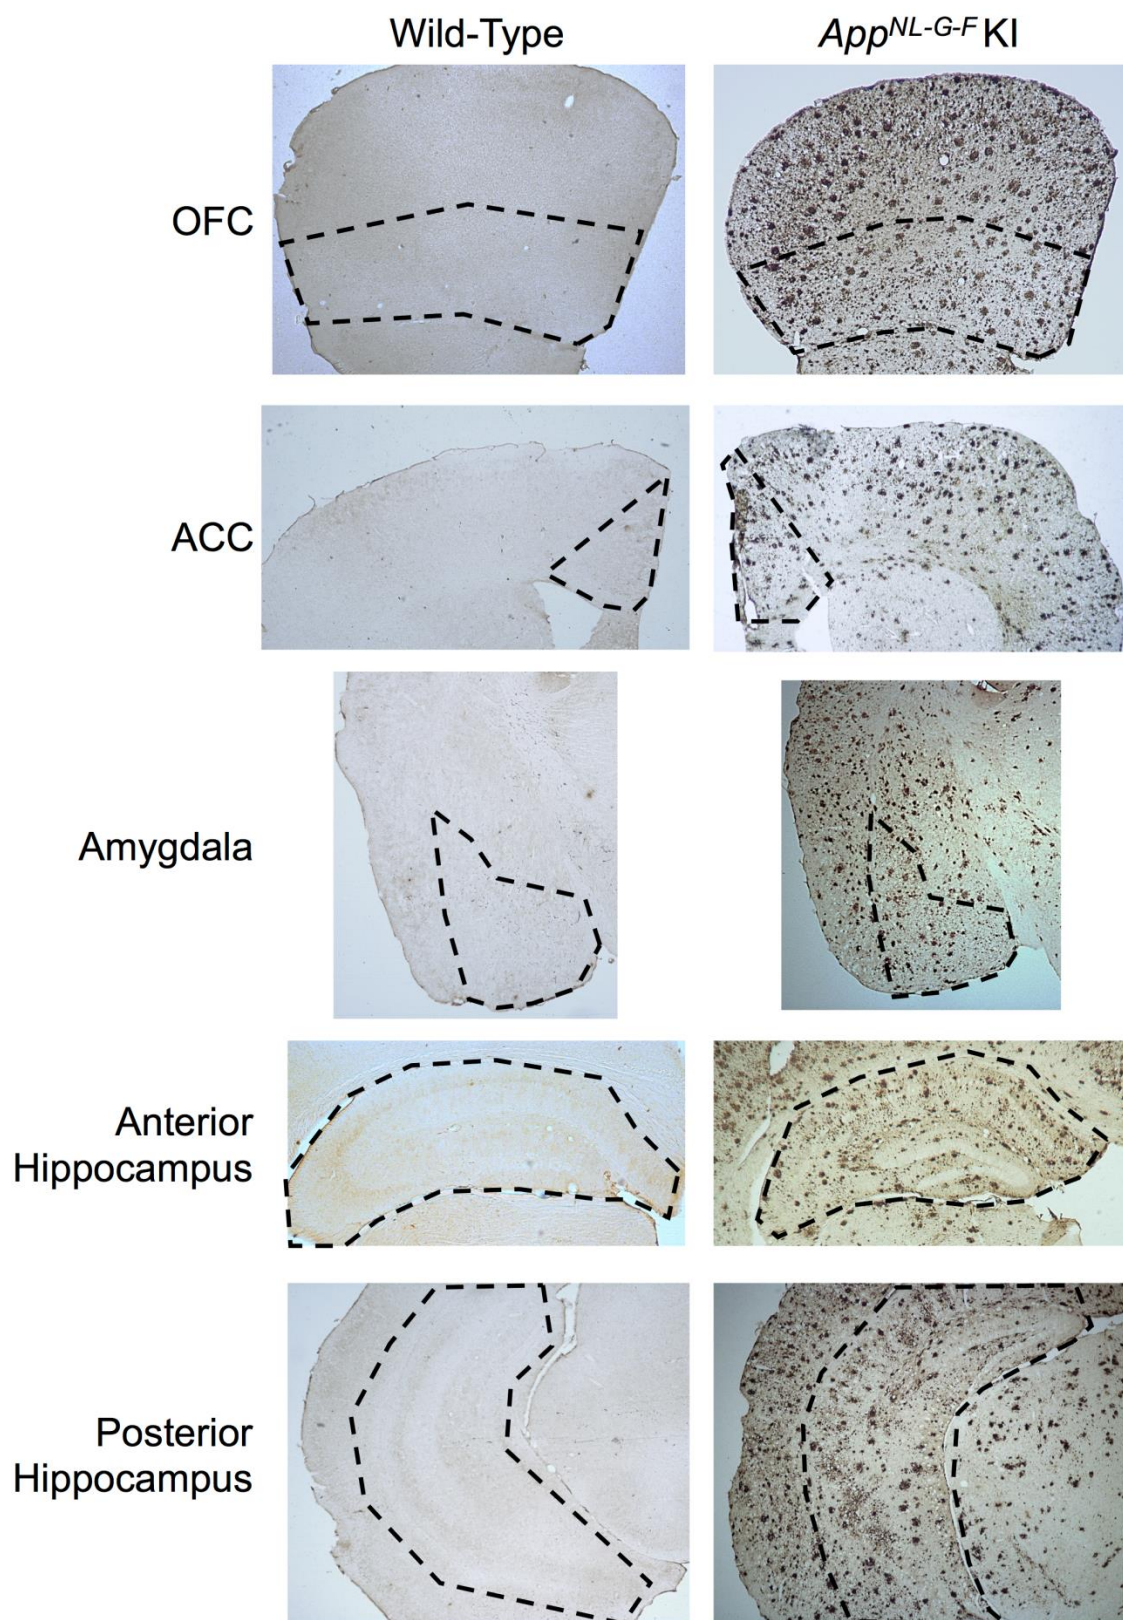

**Figure S3.** Amyloid plaque staining in wild-type and *App<sup>NL-G-F</sup> KI* mice in the orbitofrontal cortex (OFC), the anterior cingulate cortex (ACC) the amygdala, and the anterior and posterior hippocampus. Dashed line represents the brain regions of interest.
